# Supplementary material
Source: PubMed Central journal article supplement (PMC9029095)
Supplement: bloodBLD2022015545-suppl1.pdf [file bloodBLD2022015545-suppl1.pdf]

# **SARS-CoV-2 vaccination and immune thrombotic thrombocytopenic purpura**

## **SUPPLEMENTAL DATA**

### **CONTENTS**

|                                                                                                                                                                    | Pages |
|--------------------------------------------------------------------------------------------------------------------------------------------------------------------|-------|
| Table S1. Details of iTTP recurrence after COVID-19 vaccines in the multicenter (Johns Hopkins University, University of Minnesota, Ohio State University) cohort. | 2     |
| Table S2. Details of iTTP cases after COVID-19 vaccines reported in VAERS                                                                                          | 3-5   |

**Table S1. Details of iTTP recurrence after COVID-19 vaccines in the multicenter (Johns Hopkins University, University of Minnesota, Ohio State University) cohort**

| Site | Age/<br>Sex | Vaccine<br>type /<br>dose   | Days<br>since<br>vaccine<br>dose | ADAMTS13<br>activity<br>within 3<br>months pre-<br>vaccine | Platelet<br>count /<br>ADAMTS13<br>at diagnosis<br>of relapse | Symptoms                                       | Treatment and outcome                                                                                                                                                                                                                                                                                                                                                                                               |
|------|-------------|-----------------------------|----------------------------------|------------------------------------------------------------|---------------------------------------------------------------|------------------------------------------------|---------------------------------------------------------------------------------------------------------------------------------------------------------------------------------------------------------------------------------------------------------------------------------------------------------------------------------------------------------------------------------------------------------------------|
| OSU  | 28/F        | Pfizer /<br>1st             | 6                                | < 2%                                                       | 57 x 10 <sup>9</sup> /L,<br><5%                               | Petechiae,<br>ataxia, and<br>slurred<br>speech | Caplacizumab, rituximab, and corticosteroids without plasma exchange. Platelet count normal in 24 hours and ADAMTS13 60% at 9 weeks.                                                                                                                                                                                                                                                                                |
| JHU  | 34/F        | Moderna/<br>2 <sup>nd</sup> | 35                               | Unknown                                                    | 5 x 10 <sup>9</sup> /L,<br><5%                                | Headache,<br>left arm<br>weakness              | Plasma exchange, corticosteroids, and rituximab. Platelet count normal after 5 days, ADAMTS13 normalization (78%) at 25 days from diagnosis.                                                                                                                                                                                                                                                                        |
| JHU  | 56/F        | Pfizer /<br>2 <sup>nd</sup> | 52                               | 100%                                                       | 134 x 10 <sup>9</sup> /L,<br>19%                              | Fatigue                                        | Thrombocytopenia was likely due to a myeloid disorder rather than clinical iTTP relapse.<br><br>Received plasma exchange, steroids, rituximab and recovered ADAMTS13 activity (>100%) at two weeks but thrombocytopenia persisted. Bone marrow biopsy revealed a clonal myeloid disorder most consistent with chronic myelomonocytic leukemia (hypercellular marrow with 60% monocytes, del 20q and KRAS mutation). |
| Minn | 35/F        | Pfizer /<br>1st             | 143                              | Unknown                                                    | 22 x 10 <sup>9</sup> /L,<br><5%                               | Fatigue,<br>cognitive<br>impairment            | Plasma exchange, corticosteroids and rituximab. Platelet count normalization after 5 days of plasma exchange.                                                                                                                                                                                                                                                                                                       |

**Table S2. Details of iTTP cases after mRNA COVID-19 vaccines reported in VAERS**

| VAERS no  | Vaccine type | Age | Sex  | Dose no. | Time since dose | Symptoms                                                                                       | Platelet count (x10 <sup>9</sup> /L) | AD13 activity | Notes on treatment and outcome                                                                                                      | Certainty of TTP Diagnosis |
|-----------|--------------|-----|------|----------|-----------------|------------------------------------------------------------------------------------------------|--------------------------------------|---------------|-------------------------------------------------------------------------------------------------------------------------------------|----------------------------|
| 1407787-1 | Moderna      | 19  | F    | 2        | 51              | Purpuric rash, thrombocytopenia                                                                | 4                                    | NR            | NR                                                                                                                                  | Possible                   |
| 1470412-1 | Moderna      | 25  | F    | 1        | 29              | Epistaxis, thrombocytopenia, anemia                                                            | 7                                    | NR            | PEX, IVIG, steroids, Steroids, multiple other drugs (unspecified)                                                                   | Possible                   |
| 1574026-1 | Moderna      | 25  | F    | 2        | 0               | Thrombocytopenia                                                                               | 16                                   | NR            | Patient died, treatment NR                                                                                                          | Probable                   |
| 1159611-1 | Moderna      | 22  | M    | UNK      | 1               | Dizziness, nausea, vomiting, petechiae, epistaxis, thrombocytopenia                            | 9                                    | <5%           | PEX                                                                                                                                 | Confirmed                  |
| 1431299-1 | Moderna      | 24  | M    | 2        | 10              | Right arm weakness, facial droop, tongue deviation, altered mental status, thrombocytopenia    | 24                                   | <5%           | PEX, steroids, rituximab                                                                                                            | Confirmed                  |
| 1238201-1 | Moderna      | 42  | F    | 2        | 62              | Chills, fatigue, loss of consciousness, myalgia, fever                                         | 9                                    | <5%           | PEX, steroids, rituximab. Plan to start caplacizumab. Outcome pending                                                               | Confirmed                  |
| 1280882-1 | Moderna      | 49  | F    | 1        | 8               | Recurrent TTP presenting with diarrhea, malaise, foggy                                         | 16                                   | NR            | NR, episode resolved, foggy persists                                                                                                | Probable                   |
| 1740051-1 | Moderna      | 48  | M    | 1        | NR              | Recurrent TTP with dysarthria, Hemiparesis, Parasthesia                                        | 10                                   | <3%           | PEX, steroids, rituximab.                                                                                                           | Confirmed                  |
| 1430563-1 | Moderna      | 50  | F    | 2        | 21              | Decreased appetite, dyspnea, fatigue, headache. Discharge home from ER and found down at home. | NR                                   | NR            | NR, Died in hospital. Doctors suspected TTP.                                                                                        | Possible                   |
| 1318918-1 | Moderna      | 62  | F    | 2        | 14              | Stroke                                                                                         | <10                                  | <5%           | NR, outcome pending, permanent hemiparesis and speech deficit predicted                                                             | Confirmed                  |
| 1420583-1 | Moderna      | 63  | M    | 2        | 11              | Abdominal pain, AKI, dyspnea, fatigue, altered mental status                                   | 14                                   | <5%           | PEX. Hematologic parameters, renal function, and mentation have improved                                                            | Confirmed                  |
| 1713660-1 | Moderna      | 63  | M    | 2        | 13              | Abdominal pain, delirium, epistaxis, Fecal vomiting, Hematemesis, Headache, Malaise            | NR                                   | NR            | Pt died. Dx with brain hemorrhage that led to stroke, tentative dx of TTP versus ITP due to low platelet count                      | Possible                   |
| 1909945-1 | Moderna      | 71  | F    | 3        | 28              | Aphasia, back pain, seizure, unresponsive to stimuli                                           | 17                                   | NR            | Intubated and treated with PEX and caplacizumab. Still intubated at time of documentation, but becoming more responsive to commands | Probable                   |
| 1216640-1 | Moderna      | 73  | M    | 1        | 26              | Stroke-like symptoms, Transient ischemic attack, Speech disorder                               | 19K                                  | <5%           | PLEX, steroids, and rituximab. Pt recovered well                                                                                    | Confirmed                  |
| 1214316-1 | Moderna      | 81  | Male | 1        | 1               | Confusion, weakness, fatigue, impaired speech, thrombocytopenia, schistocytes                  | 34                                   | NR            | Plasma infusion, PEX, steroids                                                                                                      | Probable                   |

|               |        |     |   |     |     |                                                                                                |    |     |                                          |           |
|---------------|--------|-----|---|-----|-----|------------------------------------------------------------------------------------------------|----|-----|------------------------------------------|-----------|
| 10176<br>42-1 | Pfizer | 19  | F | 1   | 9   | TTP relapse in a patient with history of TTP, off treatment for 5 years                        | NR | NR  | NR                                       | Probable  |
| 12080<br>74-1 | Pfizer | 26  | F | 2   | 64  | Abdominal pain, low grade fever                                                                | NR | NR  | PEX                                      | Possible  |
| 09103<br>16-1 | Pfizer | 22  | M | 1   | 4   |                                                                                                | 2  | NR  | PEX, corticosteroids                     | Possible  |
| 14138<br>89-1 | Pfizer | 20  | M | 1   | 26  | Chest pain, arm numbness, abdominal tingling                                                   | 31 | 7%  | PLEX, steroids, rituximab, caplacizumab. | Confirmed |
| 12676<br>37-1 | Pfizer | 30  | F | 2   | 27  |                                                                                                | 9  | NR  | NR. Pt alive after hospital treatment    | Possible  |
| 15318<br>91-1 | Pfizer | 32  | F | UNK | 26  | Facial and arm numbness and weakness, chest pain                                               | 8  | NR  | Hx of aHUS, treated with PLEX            | Probable  |
| 19126<br>19-1 | Pfizer | 32  | M | 2   | 82  | Headache, confusion, slurred speech, seizure, stroke                                           | 5  | <5  | PEX, steroids and Caplacizumab           | Confirmed |
| 10319<br>09-1 | Pfizer | 56  | F | 2   | 22  | Back pain, thrombocytopenia                                                                    | 9  | NR  | PEX and steroids. Patient died           | Probable  |
| 12098<br>25-1 | Pfizer | 54  |   | 2   | 23  | NR                                                                                             | NR | NR  | NR. Patient died. Treatment NR           | Possible  |
| 12733<br>29-1 | Pfizer | 59  | F | 2   | 0   | Word finding difficulty, weakness, headache, jaw pain, decreased oral intake, stroke           | NR | NR  | PEX                                      | Probable  |
| 11870<br>08-1 | Pfizer | 64  | F | 1   | 0   | Fatigue, malaise, pain, pyrexia, emesis, rash                                                  | 12 | NR  | PEX, steroids, antibiotics               | Possible  |
| 14300<br>36-1 | Pfizer | 61  | M | 1   | 3   | Fatigue, confusion, altered mental status, decreased oral intake, Seizure, AKI                 | 6  | <3% | PEX, rituximab, RBC transfusion          | Confirmed |
| 10069<br>94-1 | Pfizer | 75  | F | 1   | 1   | Possible recurrence in patient with history of TTP in 1996                                     | NR | NR  | NR. Patient died.                        | Possible  |
| 11371<br>06-1 | Pfizer | 71  | M | 2   | 2   | Upper abdominal pain, Back pain, T aphasia                                                     | 23 | <5% | PEX, steroids. Complete resolution       | Confirmed |
| 12433<br>36-1 | Pfizer | 80  | M | 2   | 39  | Asthenia, decreased appetite, gait disturbance, encephalopathy, lethargy, malaise              | 6  | <2% | PEX, red cell and platelet transfusion   | Confirmed |
| 15180<br>10-1 | Pfizer | UNK | F | UNK | UNK | Asthenia, dysarthria, Fatigue, Headaches, Hypoesthesia                                         | NR | NR  | Platelet transfusion, other details NR   | Possible  |
| 15282<br>28-1 | Pfizer | UNK | M | 2   | UNK | Severe fatigue, shortness of breath                                                            | 22 | <2% | PEX, rituximab                           | Confirmed |
| 19419<br>18-1 | Pfizer | 80  | M | 2   | UNK | Weakness, Malaise                                                                              | NR | <2% | PEX, steroids, rituximab                 | Confirmed |
| 15872<br>65-1 | J&J    | 32  | F | 1   | 107 | Placental abruption at 35 weeks attributed to TTP requiring cesarean section, thrombocytopenia | 9K | NR  | Platelet transfusions, PEX               | Possible  |
| 13850<br>16-1 | J&J    | 42  | M | 1   | 11  | Malaise, bruising, MAHA, thrombocytopenia                                                      | NR | NR  | PEX                                      | Possible  |
| 12670<br>91-1 | J&J    | 60  | M | 1   | 6   | Contusion, fatigue, petechiae, speech problems                                                 | 13 | <5% | PLEX, steroids, and Rituximab            | Confirmed |

|               |     |             |   |   |    |                                                    |    |      |                                                    |           |
|---------------|-----|-------------|---|---|----|----------------------------------------------------|----|------|----------------------------------------------------|-----------|
| 13347<br>87-1 | J&J | U<br>N<br>K | F | 1 | 37 | Emesis, Altered mental status, acute kidney injury | 29 | <12% | PEX, steroids, hemodialysis, red cell transfusion. | Confirmed |
|---------------|-----|-------------|---|---|----|----------------------------------------------------|----|------|----------------------------------------------------|-----------|

F indicates female, M indicates male, NR indicates not reported, UNK indicates unknown, J&J indicates Johnson and Johnson

United States Department of Health and Human Services (DHHS), Public Health Service (PHS), Centers for Disease Control (CDC) / Food and Drug Administration (FDA), Vaccine Adverse Event Reporting System (VAERS) 1990 - 12/17/2021, CDC WONDER On-line Database. Accessed at <http://wonder.cdc.gov/vaers.html> on Dec 28, 2021
